# Supplementary material
Source: publisher site journal article supplement (https://www.dovepress.com/article/502850)
Supplement: Supplementary file 1 [file get_supplementary_file.php]

**Supplementary figure and figure explaining**

**
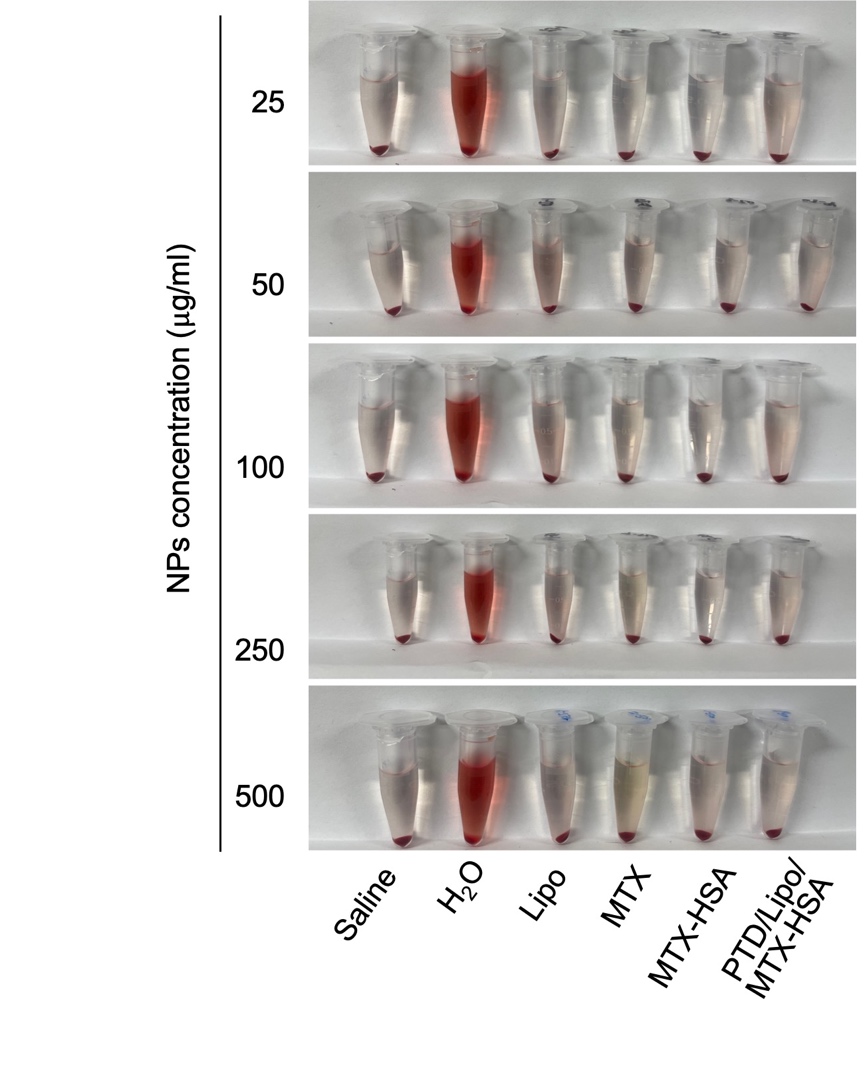
**

**Figure S1. Partial characterization of formulations**

Pictures of hemolysis in different preparations.

**
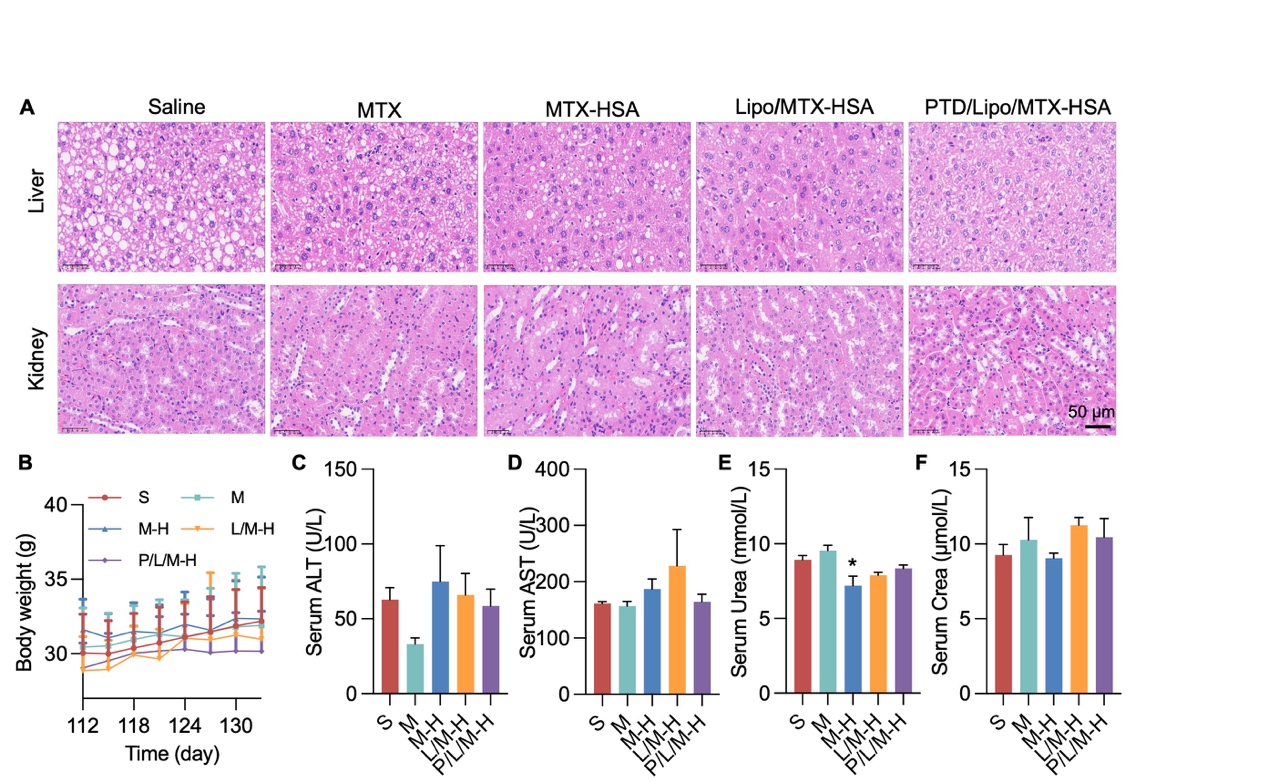
**

**Figure S2. Drug safety for *in vivo* experiments**

A. HE plots of liver and kidney tissue (scale 50 μm). B. Body weight monitoring of ApoE-/- mice; C, D, E, and F show the serum ALT, AST, urea and Crea levels, respectively. (S, saline; M, MTX; M-H, MTX-HSA; L/M-H, Lipo/MTX-HSA; P/L/M-H, PTD/Lipo/MTX-HSA; *, <0.05 vs saline)


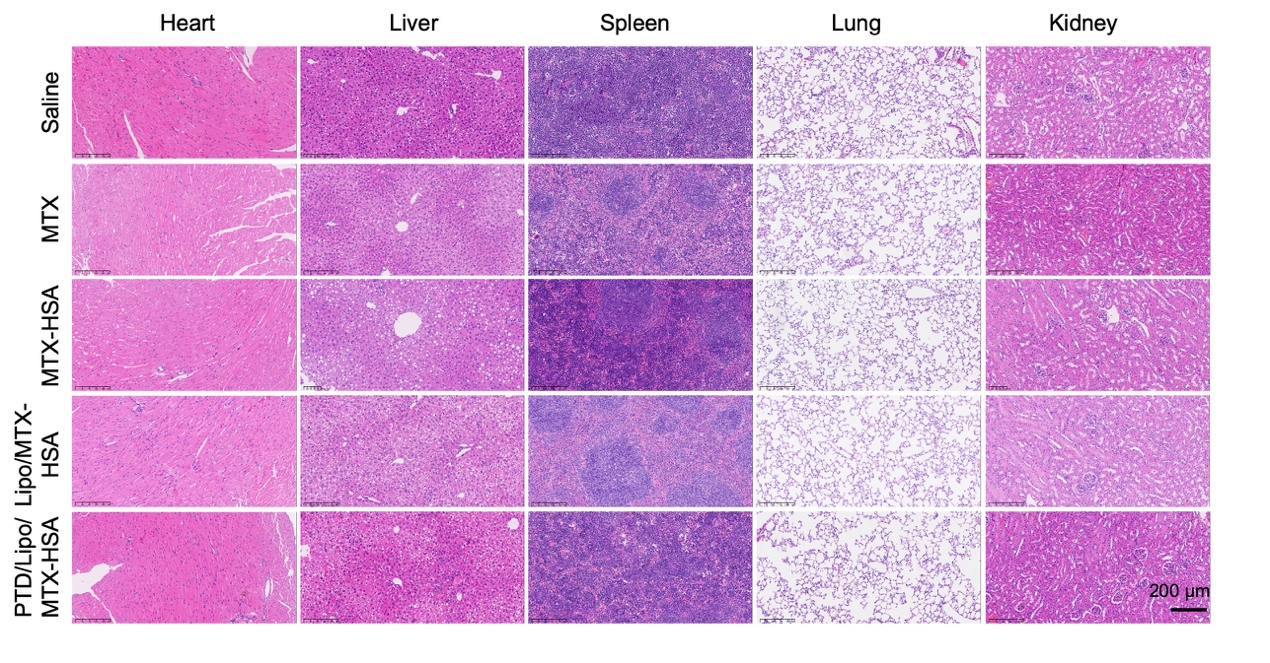


**Figure S3. Drug safety for *in vivo* experiments and antiplaque effects**

H&E plots of heart, liver, spleen, lung and kidney tissues (scale bar: 200 μm).

**
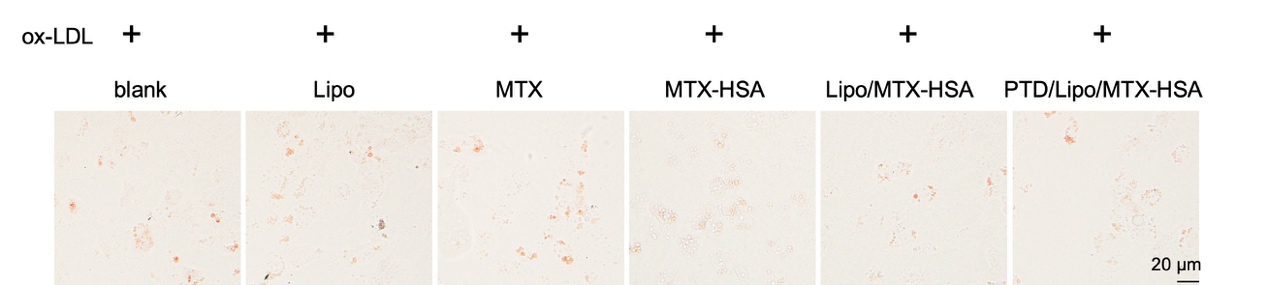
**

**Figure S4. Oil red O staining of HASMCs**

The model (ox-LDL), ox-LDL+Lipo, ox-LDL+MTX, ox-LDL+MTX-HSA, ox-LDL+Lipo/MTX-HSA and ox-LDL+PTD/Lipo/MTX-HSA preparations were treated with HASMCs, and white light imaging of oil red O staining was performed (scale 20 μm).

**
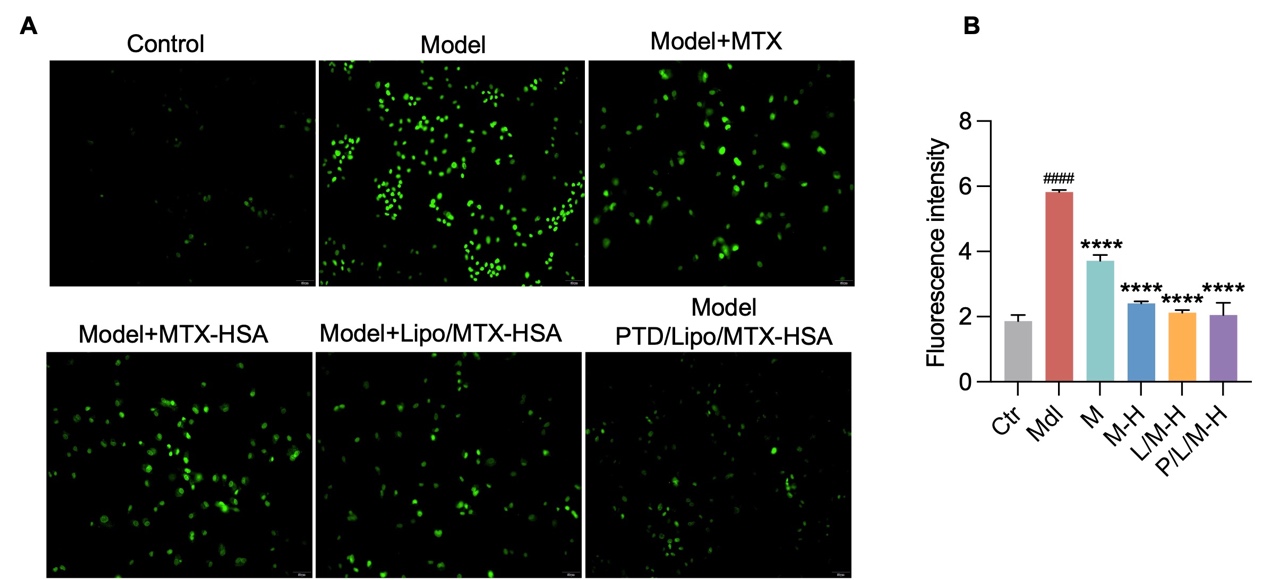
**

**Figure S5. Antiadhesion effects of the nanomaterials *in vitro***

A. Adhesion imaging of THP-1 cells carrying the BCECF probe after treatment of HUVECs with the control, model (LPS), LPS+MTX, LPS+MTX-HSA, LPS+Lipo/MTX-HSA and LPS+PTD/Lipo/MTX-HSA preparations (scale 50 μm); B is a statistical graph of E. (Ctr, control; Mdl, model ox-LDL); M, model+MTX; M-H, model+MTX-HSA; L/M-H, model+Lipo/MTX-HSA; P/L/M-H, model+PTD/Lipo/MTX-HSA; ####, <0.0001 vs control; *, <0.05; **, <0.01; ***, <0.001; ****, <0.0001 vs Model)

**
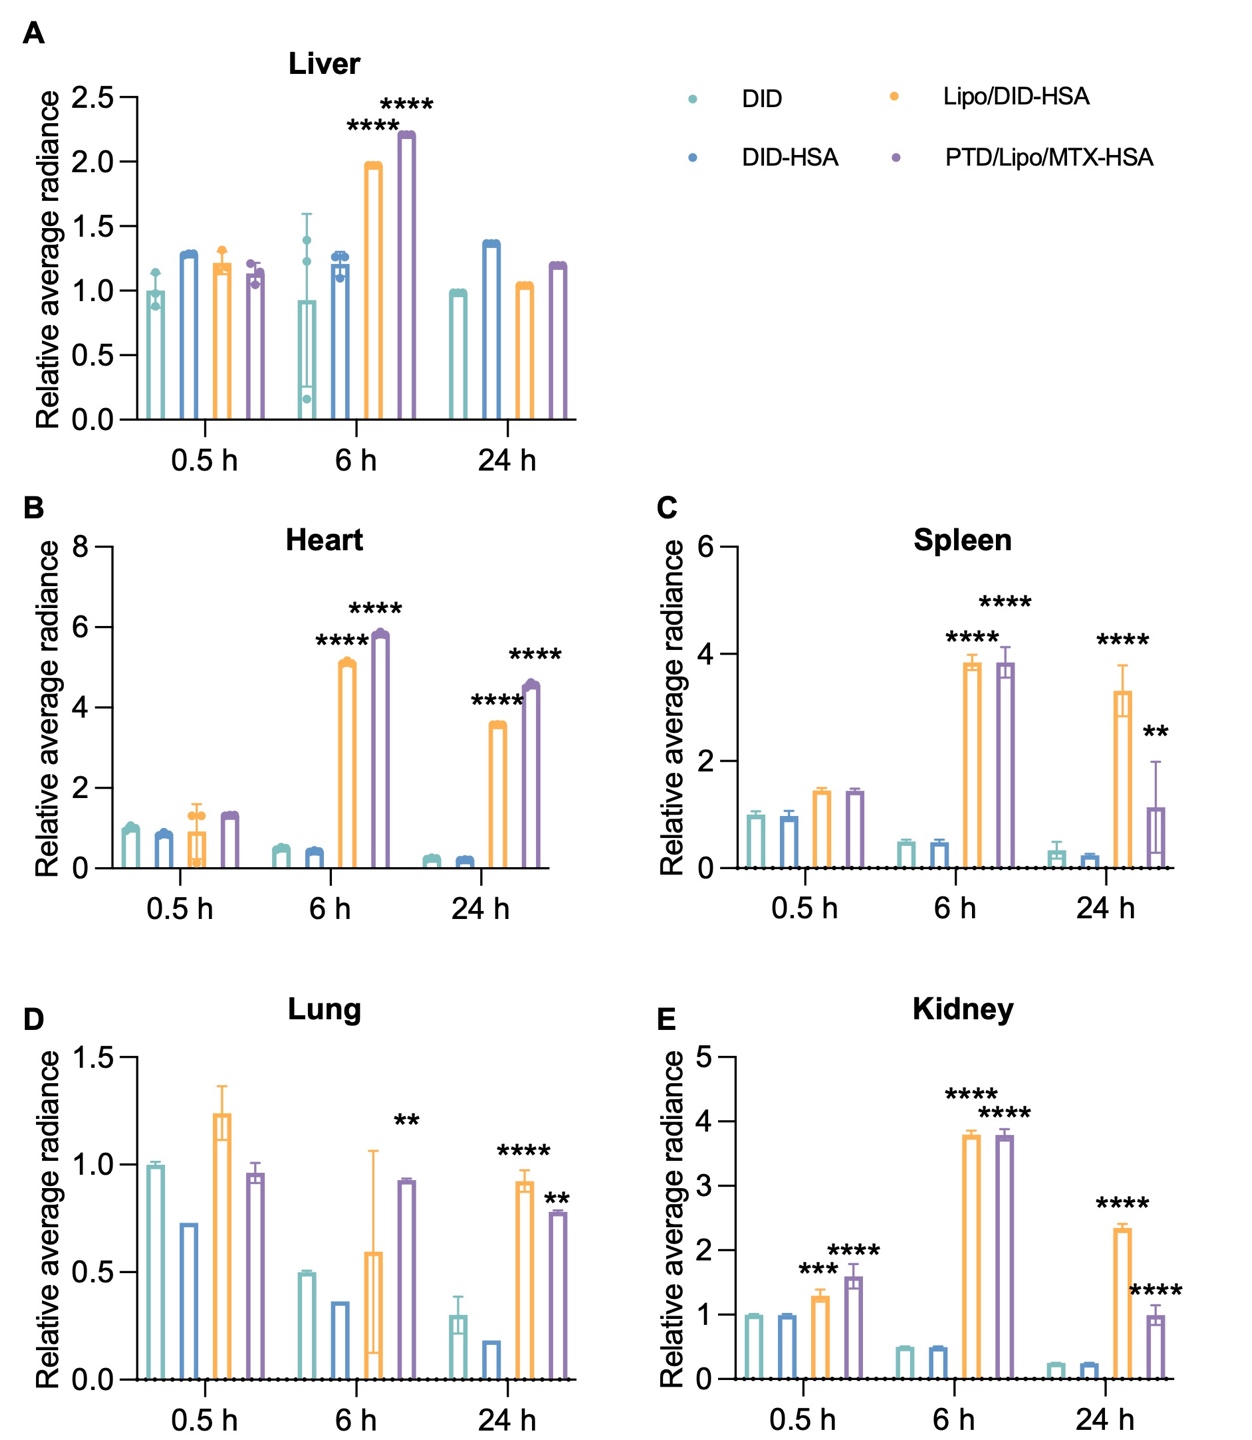
**

**Figure S6. Statistical graphs of other organs images.**

A．Liver; B. Heart; C. Spleen; D. Lung; E. Kidney. (**, <0.01 vs DID; ***, <0.001 vs DID; ****, <0.0001 vs DID)


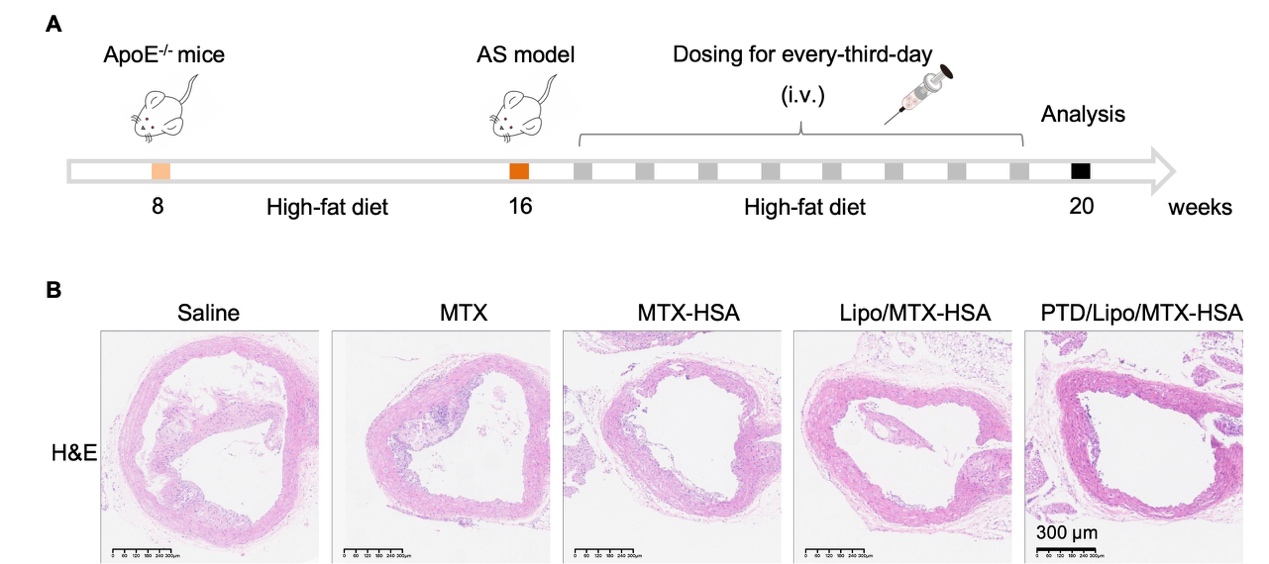


**Figure S7. Schematic and antilipidemic effects of nanomedicines**

A. Schematic of the model used for *in vivo* experiments. B. H&E-stained aortic arch tissues (scale bar: 200 μm).
